# Supplementary material for: Identification of LEFTY as a molecular marker for ovarian clear cell carcinoma
Source: PubMed Central journal article supplement (PMC5609950; doi:10.18632/oncotarget.18882), 2017-06-29
Supplement: oncotarget-08-63646-s001.pdf [file oncotarget-08-63646-s001.pdf]

# Identification of LEFTY as a molecular marker for ovarian clear cell carcinoma

## SUPPLEMENTARY MATERIALS

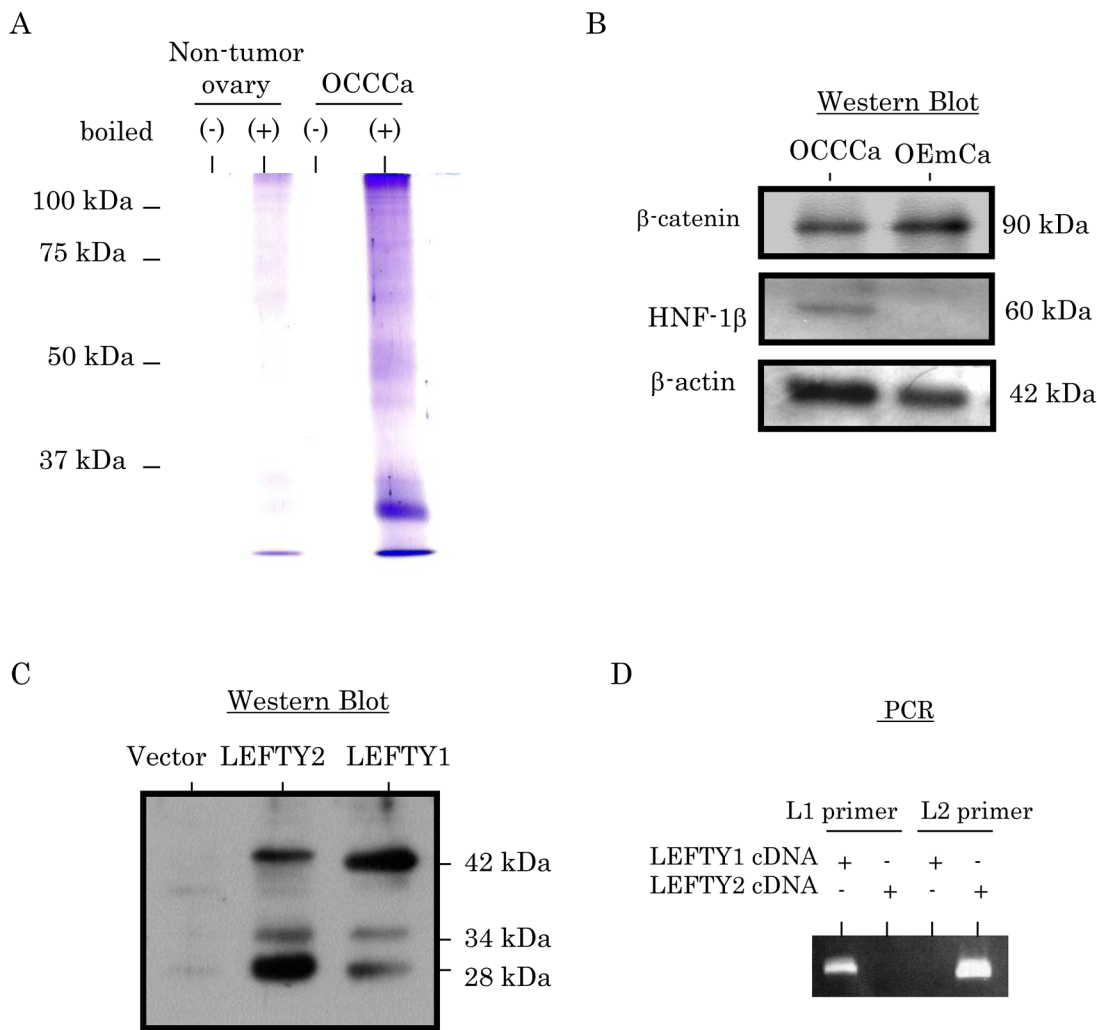

**Supplementary Figure 1:** (A) Coomassie Brilliant Blue staining of protein lysates extracted from formalin-fixed (10%) and paraffin-embedded (FFPE) samples using a high concentration Tris-buffer, with or without boiling. (B) Western blot analysis for the indicated proteins using protein lysates extracted from FFPE samples. (C) Western blot analysis of LEFTY protein expression using proteins extracted from LEFTY1- and LEFTY 2-transfected Ishikawa cells. (D) Confirmation of specific primers for *LEFTY1* and *LEFTY2* when LEFTY1 and LEFTY2 cDNAs, respectively were transfected into Ishikawa cells.

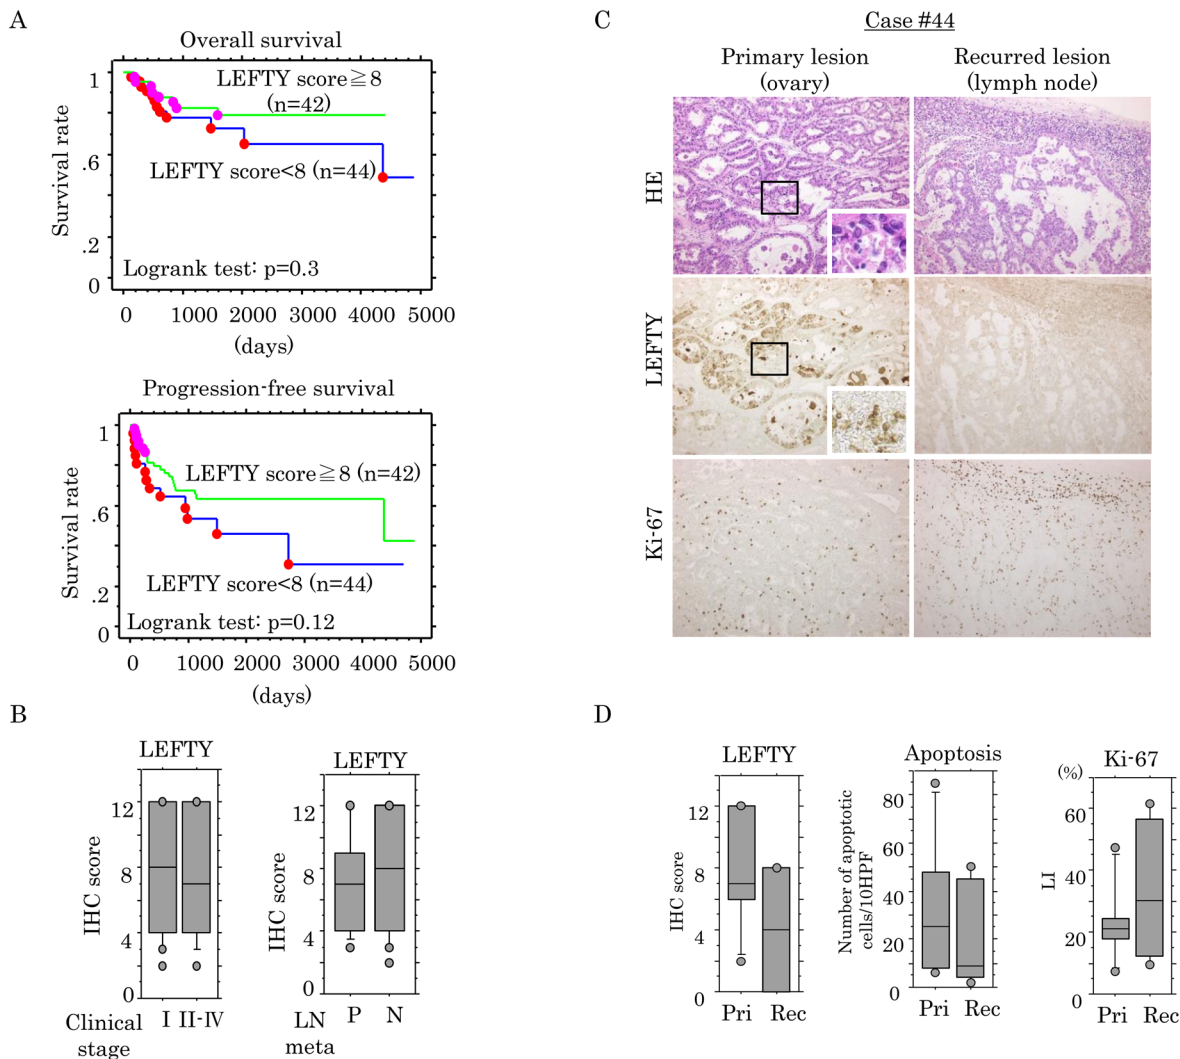

**Supplementary Figure 2: (A)** Relationship of LEFTY expression with overall survival and progression-free survival in OCCa. **(B)** Relationship of LEFTY expression with clinical stage (left) and lymph node (LN) metastasis (meta; right). **(C)** Staining is by hematoxylin and eosin (HE) and by immunohistochemistry (IHC) for LEFTY and Ki-67 in semi-serial sections of OCCa case #44 with postoperative tumor recurrence. Note the high LEFTY immunoreactivity in primary tumors, in contrast to a lack of immunostaining in recurred tumors within the lymph node. Original magnification, x200. **(D)** Relationship of LEFTY score, number of apoptotic cells, and Ki-67 labeling indices (LIs) between primary (Pri) and recurred (Rec) tumors in six OCCa cases.

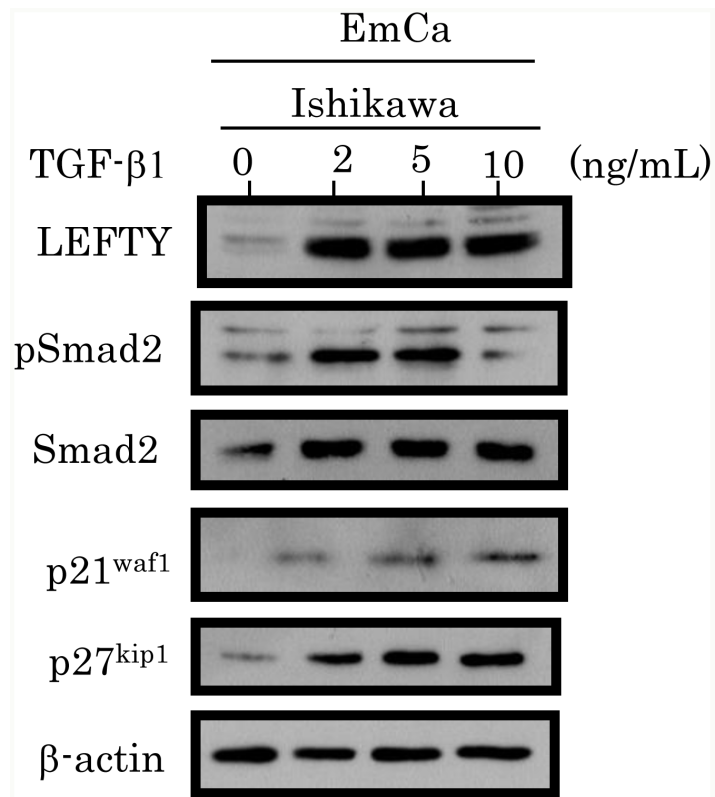

Supplementary Figure 3: Western blot analysis for the indicated proteins from Ishikawa cells after 2, 5, and 10 ng/mL TGF-β1 treatment for 24 hours.

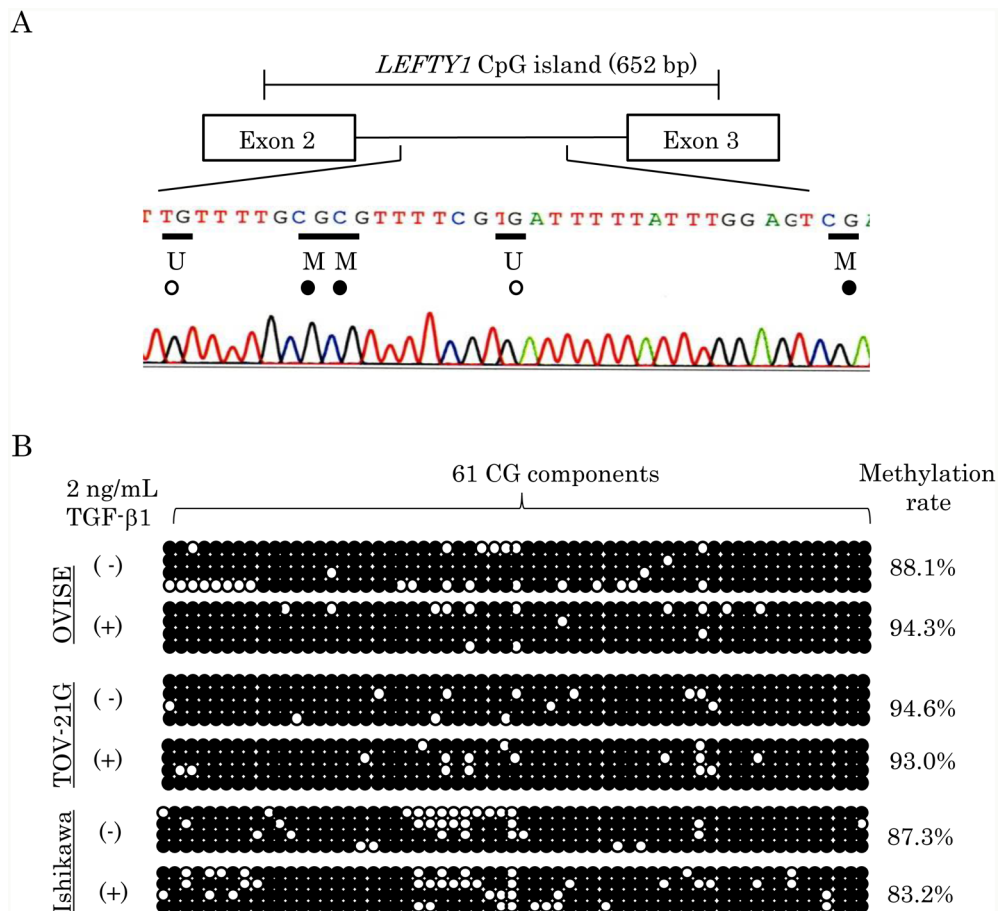

**Supplementary Figure 4: Relationship between LEFTY1 methylation and TGF-β1.** (A) CpG island DNA methylation analysis of the *LEFTY1* by sodium bisulfate sequencing. U, unmethylated (open circle); M, methylated (solid circle). (B) A total of 61 CpG islands were analyzed for DNA methylation. Each circle represents a CpG dinucleotide. Four clones are represented for each sequenced region before and after 2 ng/mL TGF-β1 treatment. Methylation percentages are indicated on the right. Open circle, unmethylated; solid circle, methylated.

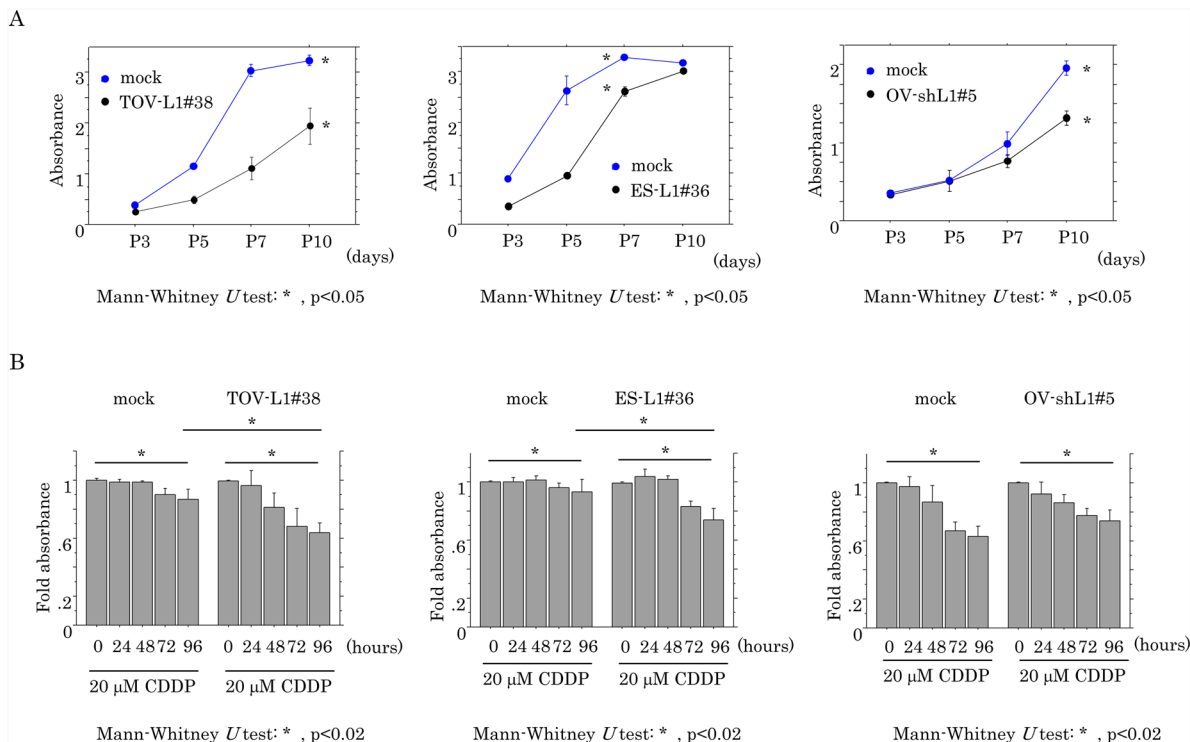

**Supplementary Figure 5: CCK-8 assay for cell proliferation and after CDDP treatment.** (A) TOV-L1#38 (left), ES-L1#36 (middle), and OV-shL1#5 (right) cells and their mock cells were seeded at  $1 \times 10^3$  cells in 96-wells. Viable cell numbers were quantitated by Cell Counting Kit-8 (CCK-8). Absorbance values are presented as mean $\pm$ SD. P3, P5, P7, and P10 indicate 3, 5, 7, and 10 days after cell passage, respectively. This experiment was performed in triplicate using independent samples. (B) Treatment of TOV-L1#38 (left), ES-L1#36 (middle), and OV-shL1#5 (right) cells and their mock cells with 20  $\mu$ M CDDP for the times shown. Cell viability was measured by CCK-8 kit. The absorbance in the absence of CDDP treatment (0 h) was set as 1 and relative absorbance values are presented as mean $\pm$ SD. This experiment was performed in triplicate using independent samples.

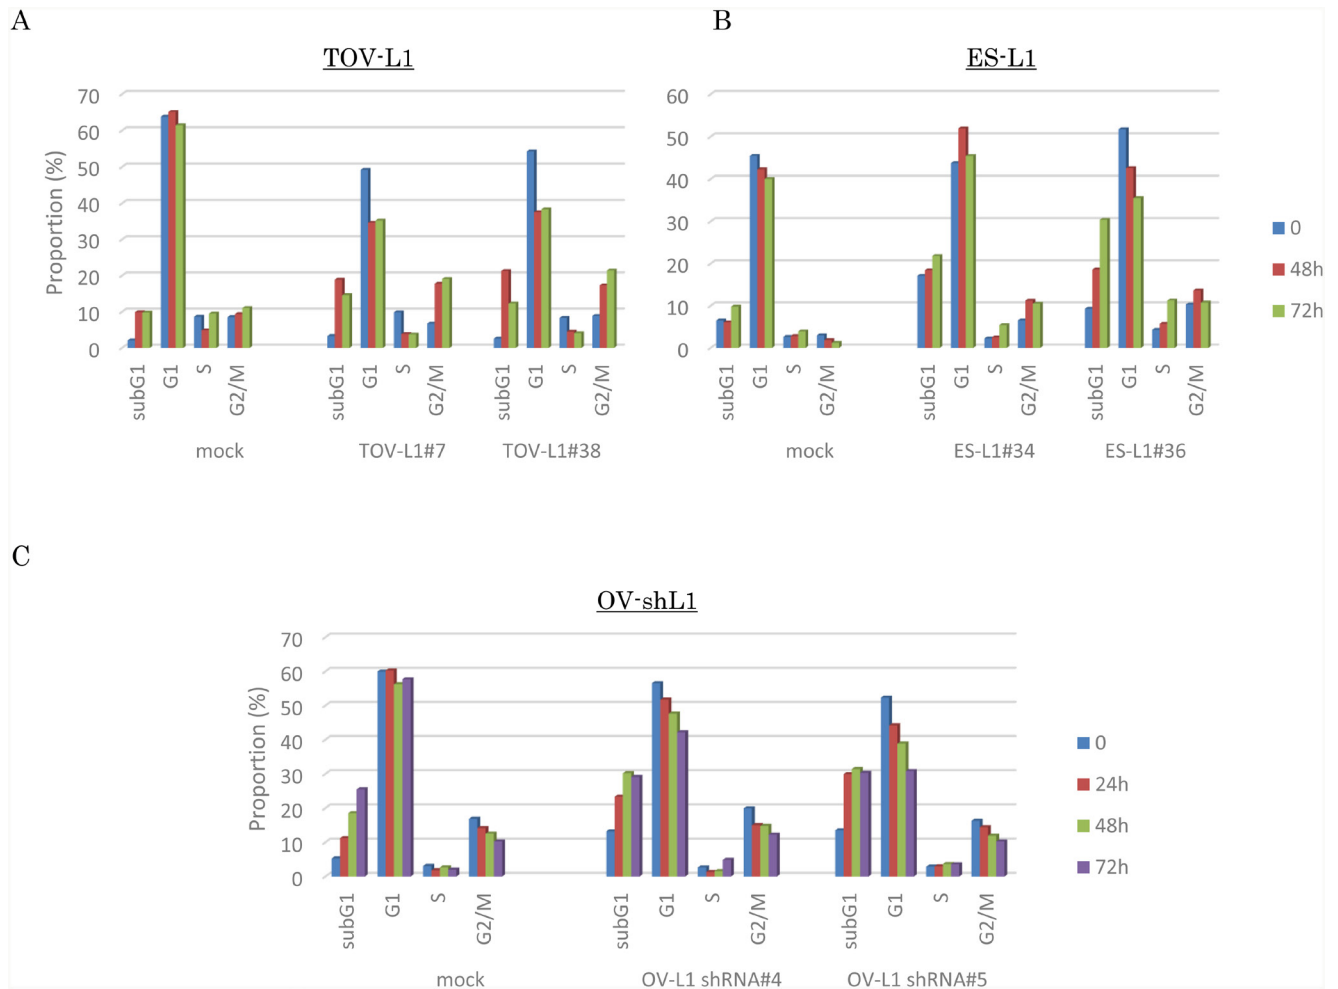

**Supplementary Figure 6:** After treatment with 20  $\mu$ M CDDP, analysis of the percentage of subG1, G1, S, and G2/M fractions in TOV-L1 (A), ES-L1 (B), and OV-shL1 cells (C) for the times shown.

Supplementary Table 1: Summary of six OCCCa cases with local recurrence

| Case no. | Age (years) | Clinical stage | Adjuvant chemotherapy               | Primary tumor     |                      |              | Lesion     | Recurred tumor    |                      |              |
|----------|-------------|----------------|-------------------------------------|-------------------|----------------------|--------------|------------|-------------------|----------------------|--------------|
|          |             |                |                                     | LEFTY (IHC score) | Apoptosis (10 H.P.F) | Ki-67 LI (%) |            | LEFTY (IHC score) | Apoptosis (10 H.P.F) | Ki-67 LI (%) |
| #3       | 43          | Ic             | CPT+NEDA                            | 12                | 85                   | 7.3          | peritoneum | 6                 | 45                   | 28           |
| #29      | 39          | II             | TC                                  | 8                 | 12                   | 18           | peritoneum | 8                 | 6                    | 9.4          |
| #35      | 56          | Ic             | TC                                  | 6                 | 48                   | 24.2         | lymph node | 2                 | 50                   | 56.4         |
| #42      | 37          | II             | DC,<br>CPT+NEDA,<br>CPT+CDDP,<br>TC | 6                 | 12                   | 18           | peritoneum | 8                 | 12                   | 12.3         |
| #44      | 69          | III            | TC                                  | 8                 | 12                   | 24.4         | lymph node | 0                 | 2                    | 32.6         |
| #45      | 56          | Ic             | TC, DC                              | 2                 | 37                   | 47.5         | lymph node | 0                 | 4                    | 61.6         |

No., number; LI, labeling index; H.P.F, high power field; IHC, immunohistochemistry

CPT, irinotecan; NEDA, nedaplatin; TC, paclitaxel+carboplatin; DC, docetaxel+carboplatin; CDDP, cisplatin.

Supplementary Table 2: Summary of *in situ* hybridization scores for mRNA of LEFTY1 and LEFTY2 in 10 ovarian clear cell carcinoma cases

| Case | <i>In situ</i> hybridization   |           |       |                                |           |       | IHC |
|------|--------------------------------|-----------|-------|--------------------------------|-----------|-------|-----|
|      | LEFTY1 mRNA ( $\alpha$ -sense) |           |       | LEFTY2 mRNA ( $\alpha$ -sense) |           |       |     |
|      | Positivity                     | Intensity | score | Positivity                     | Intensity | score |     |
| #1   | 3                              | 4         | 12    | 2                              | 3         | 6     | 12  |
| #2   | 2                              | 2         | 4     | 0                              | 0         | 0     | 6   |
| #3   | 1                              | 4         | 4     | 1                              | 2         | 2     | 6   |
| #4   | 3                              | 3         | 9     | 2                              | 2         | 4     | 12  |
| #5   | 3                              | 3         | 9     | 0                              | 0         | 0     | 12  |
| #6   | 3                              | 2         | 6     | 2                              | 4         | 8     | 4   |
| #7   | 2                              | 3         | 6     | 1                              | 1         | 1     | 12  |
| #8   | 2                              | 3         | 6     | 0                              | 0         | 0     | 12  |
| #9   | 2                              | 1         | 2     | 0                              | 0         | 0     | 2   |
| #10  | 2                              | 2         | 4     | 0                              | 0         | 0     | 12  |

IHC, immunohistochemistry.



Supplementary Table 3: Summary of LEFTY1 and LEFTY2 protein profiles detected by shotgun proteomics in ovarian clear cell carcinomas

| Protein           | Peptide sequence                               | Spectral counts |    |    |    | Modification                                  |
|-------------------|------------------------------------------------|-----------------|----|----|----|-----------------------------------------------|
|                   |                                                | C1              | C2 | C3 | C4 |                                               |
| LEFTY1            | EVPTLDR                                        | 0               | 0  | 0  | 1  |                                               |
| LEFTY1            | ADmEELVIPTHVR                                  | 2               | 2  | 0  | 1  | M3(Oxidation)                                 |
| LEFTY1            | ADMEELVIPTHVR                                  | 2               | 4  | 0  | 2  |                                               |
| LEFTY1            | AQYVALLQR                                      | 1               | 1  | 1  | 1  |                                               |
| LEFTY2            | FLASEASTHLLVFGmEQR                             | 0               | 2  | 0  | 1  | M15(Oxidation)                                |
| LEFTY2            | FLASEASTHLLVFGMEQR                             | 0               | 9  | 0  | 4  |                                               |
| LEFTY1;<br>LEFTY2 | LPPNSELVQAVLR                                  | 2               | 5  | 1  | 4  |                                               |
| LEFTY1;<br>LEFTY2 | LFQEPVPK                                       | 1               | 1  | 1  | 1  |                                               |
| LEFTY1;<br>LEFTY2 | LFQEPVPAALHR                                   | 0               | 1  | 0  | 0  |                                               |
| LEFTY1;<br>LEFTY2 | VTVEWLR                                        | 1               | 2  | 1  | 1  |                                               |
| LEFTY1;<br>LEFTY2 | TSLIDSR                                        | 1               | 1  | 0  | 1  |                                               |
| LEFTY1;<br>LEFTY2 | LVSVHESGWK                                     | 2               | 3  | 0  | 1  |                                               |
| LEFTY1;<br>LEFTY2 | AFDVTEAVNFWQQLSRPR                             | 3               | 7  | 1  | 5  |                                               |
| LEFTY1;<br>LEFTY2 | QPLLLQVSVQR                                    | 1               | 5  | 0  | 2  |                                               |
| LEFTY1;<br>LEFTY2 | EHLGPLASGAHK                                   | 2               | 2  | 1  | 2  |                                               |
| LEFTY1;<br>LEFTY2 | EHLGPLASGAHKLVR                                | 0               | 2  | 0  | 2  |                                               |
| LEFTY1            | FASQGAPAGLGEPQLELHTL<br>DLGDYGAQGDcDPEAPMTEGTR | 0               | 1  | 0  | 0  | C31(Carbamidomethyl)                          |
| LEFTY1;<br>LEFTY2 | QEmYIDLQGmK                                    | 0               | 1  | 0  | 0  | M3(Oxidation);<br>M10(Oxidation)              |
| LEFTY1;<br>LEFTY2 | QEMYIDLQGmK                                    | 0               | 1  | 0  | 0  | M10(Oxidation)                                |
| LEFTY1;<br>LEFTY2 | QEMYIDLQGMK                                    | 1               | 2  | 0  | 1  |                                               |
| LEFTY1            | WAENWVLEPPGFLAYEcVGTcR                         | 0               | 0  | 0  | 1  | C17(Carbamidomethyl);<br>C21(Carbamidomethyl) |
| LEFTY1            | QPPEALAFK                                      | 1               | 2  | 0  | 1  |                                               |
| LEFTY1            | QPPEALAFKWPFLGPR                               | 0               | 1  | 0  | 0  |                                               |
| LEFTY1            | WPFLGPR                                        | 4               | 5  | 1  | 4  |                                               |
| LEFTY1            | QcIASETDSLpMIVSIK                              | 0               | 1  | 0  | 0  | C2(Carbamidomethyl);<br>M12(Oxidation)        |
| LEFTY1            | QcIASETDSLPMIVSIK                              | 0               | 3  | 0  | 1  | C2(Carbamidomethyl)                           |
| LEFTY1;<br>LEFTY2 | TRPQVVSLPNmR                                   | 1               | 1  | 0  | 1  | M11(Oxidation)                                |
| LEFTY1;<br>LEFTY2 | TRPQVVSLPNMR                                   | 2               | 3  | 1  | 2  |                                               |
| LEFTY1;<br>LEFTY2 | cScASDGALVPR                                   | 1               | 1  | 0  | 1  | C1(Carbamidomethyl);<br>C3(Carbamidomethyl)   |
| Total number      |                                                |                 |    |    |    |                                               |
| LEFTY1            |                                                | 28              | 58 | 8  | 36 |                                               |
| LEFTY2            |                                                | 18              | 49 | 6  | 29 |                                               |
